# Supplementary material for: Thermodynamics of Potential CHO Metabolites in a Reducing Environment
Source: MDPI journal article supplement (doi:10.3390/life11101025), 2021-09-29
Supplement: s1 [file s1]

## Supplementary Material

# Thermodynamics of Potential CHO Metabolites in a Reducing Environment

Jeremy Kua \*, Alexandra L. Hernandez and Danielle N. Velasquez

Department of Chemistry & Biochemistry, University of San Diego, San Diego, CA 92110, USA

\* Correspondence: Correspondence: jkua@sandiego.edu

### Part 1: Do newer “improved” DFT functionals give better results?

Previous work in our lab has compared our protocol (using the B3LYP functional) versus other functionals such as PBE or post-Hartree-Fock methods such as MP2. In these cases, B3LYP still gives better results when compared to available experimental results (which can be limited for the systems we have studied). One of the more recent robust functionals is M06-2X, but using this (along with the recommended D3 Grimme dispersion correction) in our protocol does not improve the B3LYP results as shown in Table S1. The recommended basis set to use with M06-2X at a similar level is cc-pVDZ but once again, the results are not an improvement over B3LYP//6-311G\*\*. As stated in the Methods section of the main text, computational chemistry is about error-cancellation and our protocol at what seems an inferior older functional (B3LYP) works surprisingly well. One could attempt to dissect these results further to ascertain *why* the M06-2X do not perform as well, but that is beyond the scope of the present work.

**Table S1.** Comparison of  $\Delta G$  (kcal/mol) for uncatalyzed oxidative TCA cycle reactions using M06-2X-D3 functional and the cc-pVDZ basis set.

| Reaction                                                                                   | Alberty       | B3LYP//<br>6-311G** | M06-2X-D3//<br>6-311G** | M06-2X-D3//<br>cc-pVDZ |
|--------------------------------------------------------------------------------------------|---------------|---------------------|-------------------------|------------------------|
| ACE + OXA $\rightarrow$ CIT                                                                | -0.81         | +2.49               | -10.13                  | -10.66                 |
| CIT $\rightarrow$ CAC + H <sub>2</sub> O                                                   | +2.01         | +3.80               | +11.38                  | +15.80                 |
| CAC + H <sub>2</sub> O $\rightarrow$ ISC                                                   | -0.43         | -3.02               | -11.41                  | -14.86                 |
| ISC $\rightarrow$ OXS + H <sub>2</sub>                                                     | +19.04        | +17.22              | +27.63                  | +22.54                 |
| OXS + H <sub>2</sub> O $\rightarrow$ AKG + H <sub>2</sub> CO <sub>3</sub>                  | -9.69         | -8.46               | -11.01                  | -4.74                  |
| AKG + H <sub>2</sub> O $\rightarrow$ SUC + H <sub>2</sub> + H <sub>2</sub> CO <sub>3</sub> | -6.75         | -7.98               | -9.08                   | -10.97                 |
| SUC $\rightarrow$ FUM + H <sub>2</sub>                                                     | +25.38        | +27.12              | +35.34                  | +31.66                 |
| FUM + H <sub>2</sub> O $\rightarrow$ MAL                                                   | -0.86         | -1.22               | -8.84                   | -11.82                 |
| MAL $\rightarrow$ OXA + H <sub>2</sub>                                                     | +16.01        | +15.08              | +25.58                  | +20.34                 |
| <i>Net Cycle:</i>                                                                          | <b>+43.90</b> | <b>+45.03</b>       | <b>+49.46</b>           | <b>+37.29</b>          |

### Part 2: Shouldn't all those carboxylic acids be carboxylates in solutions close to neutral pH?

Our present work is benchmarked against experimentally-derived (Alberty and eQuilibrator) at pH 7 where you would expect the majority of organic acids encountered to be predominantly in their anionic carboxylate form. As shown in Table 2 in the main text, the anions yield poorer results for the individual steps (although the net cycle is overall similar). In Table S2 below, we use the same abbreviations, but all acid groups are carboxylates. Here we also include M06-2X anion results. To repeat the adage, error-cancellation in our protocol works surprisingly well. One could attempt to dissect these results further to ascertain *why* the anions do not perform as well, but once again that's

beyond the scope of the present work. For B3LYP we found that using 6-311G\*\*++ versus 6-311G\*\*+ makes practically no difference. (For cc-pVDZ we only used ++)

**Table S2.** Comparison of  $\Delta G$  (kcal/mol) for uncatalyzed oxidative TCA cycle reactions using anions.

| Reaction                                                                         | Alberty       | B3LYP//<br>6-311G**+ | M06-2X-D3//<br>cc-pVDZ++ |
|----------------------------------------------------------------------------------|---------------|----------------------|--------------------------|
| ACE + OXA $\rightarrow$ CIT                                                      | −0.81         | +8.97                | −6.68                    |
| CIT $\rightarrow$ CAC + H <sub>2</sub> O                                         | +2.01         | −3.34                | +6.33                    |
| CAC + H <sub>2</sub> O $\rightarrow$ ISC                                         | −0.43         | +3.29                | −6.51                    |
| ISC $\rightarrow$ OXS + H <sub>2</sub>                                           | +19.04        | +11.30               | +19.78                   |
| OXS + H <sub>2</sub> O $\rightarrow$ AKG + HCO <sub>3</sub> (−)                  | −9.69         | −7.51                | −3.67                    |
| AKG + H <sub>2</sub> O $\rightarrow$ SUC + H <sub>2</sub> + HCO <sub>3</sub> (−) | −6.75         | −3.63                | +0.05                    |
| SUC $\rightarrow$ FUM + H <sub>2</sub>                                           | +25.38        | +21.53               | +26.78                   |
| FUM + H <sub>2</sub> O $\rightarrow$ MAL                                         | −0.86         | −4.74                | −3.51                    |
| MAL $\rightarrow$ OXA + H <sub>2</sub>                                           | +16.01        | +14.26               | +20.99                   |
| <b>Net Cycle:</b>                                                                | <b>+43.90</b> | <b>+49.60</b>        | <b>+53.56</b>            |

Table S3 below compares the B3LYP//6-31G\*\*+ anion calculations to the neutral molecule calculations alongside experimentally-derived eQuilibrator data and group-additivity Jankowski data. There is a good match between the neutral molecule quantum data and eQuilibrator, both for individual reactions and the net cycle. For the anion calculations, several steps show similar  $\Delta G$  compared to the neutral case, but there are also notable differences (as large as 7 kcal/mol). The net cycle difference is ~5 kcal/mol. For the anions HCO<sub>3</sub>(−) is used instead of H<sub>2</sub>CO<sub>3</sub> in the two reactions requiring addition of a CO<sub>2</sub>-equivalent.

**Table S3.** Comparison of  $\Delta G$  (kcal/mol) for reductive 3HP/4HB Cycle.

| Reaction                                                                    | eQuilibrator  | B3LYP (neutral) | B3LYP (anion) | Jankowski     |
|-----------------------------------------------------------------------------|---------------|-----------------|---------------|---------------|
| ACE + H <sub>2</sub> CO <sub>3</sub> $\rightarrow$ MLN + 2 H <sub>2</sub> O | +5.21         | +6.86           | +4.02         | +14.64        |
| MLN + H <sub>2</sub> $\rightarrow$ MSA + H <sub>2</sub> O                   | +1.20         | −0.03           | +4.06         | −3.97         |
| MSA + H <sub>2</sub> $\rightarrow$ 3HP                                      | −13.96        | −13.51          | −13.63        | −9.48         |
| 3HP $\rightarrow$ ACR + H <sub>2</sub> O                                    | +2.65         | +3.14           | −2.27         | +12.99        |
| ACR + H <sub>2</sub> $\rightarrow$ PRP                                      | −27.51        | −23.89          | −24.59        | −33.43        |
| PRP + H <sub>2</sub> CO <sub>3</sub> $\rightarrow$ MEM + H <sub>2</sub> O   | +9.68         | +2.71           | +4.55         | +12.83        |
| MEM $\rightarrow$ SUC                                                       | −3.99         | −4.29           | −2.58         | +5.05         |
| SUC + H <sub>2</sub> $\rightarrow$ SSA + H <sub>2</sub> O                   | +1.84         | +2.43           | +4.39         | −7.21         |
| SSA + H <sub>2</sub> $\rightarrow$ 4HB                                      | −8.27         | −11.88          | −11.04        | −9.48         |
| 4HB $\rightarrow$ CRT + H <sub>2</sub> O                                    | −4.71         | −2.31           | −9.10         | +1.92         |
| CRT + H <sub>2</sub> O $\rightarrow$ 3HB                                    | −4.90         | −0.66           | +5.04         | −3.73         |
| 3HB $\rightarrow$ AcACE + H <sub>2</sub>                                    | +12.04        | +10.58          | +8.70         | +8.02         |
| AcACE + H <sub>2</sub> O $\rightarrow$ 2 ACE                                | −13.91        | −14.18          | −17.15        | −3.30         |
| <b>Net Cycle:</b>                                                           | <b>−44.63</b> | <b>−45.03</b>   | <b>−49.60</b> | <b>−15.15</b> |

The 3HP bicycle and the DC/4HB pathways overlap substantially with the TCA and 3HP/4HB pathways. Table S4 below includes unique reactions not found in Tables S2 and S3. For the anions HCO<sub>3</sub>(−) is used instead of H<sub>2</sub>CO<sub>3</sub> in the two reactions requiring addition of a CO<sub>2</sub>-equivalent. For the ACE  $\rightarrow$  PYR conversion, the Alberty  $\Delta G$  is +8.06 kcal/mol. For the MAL  $\rightarrow$  ACE + GLX conversion, Alberty  $\Delta G$  is +1.46 kcal/mol. Alberty does not have values for MML, MSC and CTM. Overall, comparisons do not match up as well for reactions involving MML, MSC, CTM.

**Table S4.** Comparison of  $\Delta G$  (kcal/mol) for additional reactions in DC/4HB cycle and 3HP bicycle.

| Reaction                                                                         | eEquilibrator | B3LYP (neutral) | B3LYP (anion) | Jankowski |
|----------------------------------------------------------------------------------|---------------|-----------------|---------------|-----------|
| ACE + H <sub>2</sub> CO <sub>3</sub> + H <sub>2</sub> → PYR + 2 H <sub>2</sub> O | +5.76         | +7.48           | +6.64         | +7.40     |
| PRP + GLX → MML                                                                  | −1.62         | −6.27           | −0.54         | +13.37    |
| MML → MSC + H <sub>2</sub> O                                                     | +0.81         | −1.36           | −5.01         | +2.48     |
| MSC + H <sub>2</sub> O → CTM                                                     | −2.97         | −1.68           | −5.94         | −11.89    |
| CTM → PYR + ACE                                                                  | −5.84         | −1.03           | −8.82         | +0.71     |
| MAL → ACE + GLX                                                                  | +0.83         | +3.33           | +2.14         | +0.75     |

**Part 3: The Full Data Set**

The full list of all  $G_r$  values, compound names, abbreviations, molecular formulae, and overall carbon oxidation states are found in Table S5 below. If “(hyd)” is included in the name, it means the hydrate is the most stable form. If “(enol)” is included in the name, the enol is the most stable form.

**Table S5.** Full set of compounds and  $G_r$  values (kcal/mol).

| Name                 | Abbr. | Molecular formula                            | Oxid. State | eEquilibrator $G_r$ | Quantum $G_r$ |
|----------------------|-------|----------------------------------------------|-------------|---------------------|---------------|
| C <sub>1</sub>       |       |                                              |             |                     |               |
| methane              |       | CH <sub>4</sub>                              | −4          | −46.49              | −47.47        |
| methanol             |       | CH <sub>4</sub> O                            | −2          | −18.88              | −19.14        |
| formaldehyde (hyd)   |       | CH <sub>2</sub> O                            | 0           | −2.08               | −4.69         |
| carbon monoxide      |       | CO                                           | 2           | 2.77                | 3.33          |
| formic acid          |       | CH <sub>4</sub> O <sub>2</sub>               | 2           | −5.71               | −5.23         |
| C <sub>2</sub>       |       |                                              |             |                     |               |
| ethane               |       | C <sub>2</sub> H <sub>6</sub>                | −6          |                     | −76.73        |
| ethylene             |       | C <sub>2</sub> H <sub>4</sub>                | −4          | −48.67              | −47.91        |
| ethanol              |       | C <sub>2</sub> H <sub>6</sub> O              | −4          | −53.88              | −53.78        |
| ethanal              |       | C <sub>2</sub> H <sub>4</sub> O              | −2          | −40.33              | −41.62        |
| ethoxide             |       | C <sub>2</sub> H <sub>4</sub> O              | −2          | −36.24              | −11.84        |
| ethylene glycol      | EG    | C <sub>2</sub> H <sub>6</sub> O <sub>2</sub> | −2          | −29.86              | −29.99        |
| methylformate        |       | C <sub>2</sub> H <sub>4</sub> O <sub>2</sub> | 0           |                     | −24.77        |
| acetic acid          | ACE   | C <sub>2</sub> H <sub>4</sub> O <sub>2</sub> | 0           | −44.63              | −45.03        |
| glycolaldehyde       | GA    | C <sub>2</sub> H <sub>4</sub> O <sub>2</sub> | 0           | −15.68              | −16.44        |
| glyoxal (hyd)        |       | C <sub>2</sub> H <sub>6</sub> O <sub>4</sub> | 2           | −2.68               | −1.23         |
| glycolic acid        |       | C <sub>2</sub> H <sub>4</sub> O <sub>3</sub> | 2           | −23.33              | −18.08        |
| formic anhydride     |       | C <sub>2</sub> H <sub>2</sub> O <sub>3</sub> | 4           |                     | 4.74          |
| glyoxilic acid (hyd) | GLX   | C <sub>2</sub> H <sub>4</sub> O <sub>4</sub> | 4           | −2.85               | 0.22          |
| oxalic acid          |       | C <sub>2</sub> H <sub>2</sub> O <sub>4</sub> | 6           | −3.73               | 3.14          |
| C <sub>3</sub>       |       |                                              |             |                     |               |
| propane              |       | C <sub>3</sub> H <sub>8</sub>                | −8          |                     | −108.23       |
| propene              |       | C <sub>3</sub> H <sub>6</sub>                | −6          | −86.89              | −81.69        |
| propanol             |       | C <sub>3</sub> H <sub>8</sub> O              | −6          | −87.18              | −84.99        |
| isopropanol          |       | C <sub>3</sub> H <sub>8</sub> O              | −6          | −89.30              | −88.72        |
| propenol             |       | C <sub>3</sub> H <sub>6</sub> O              | −4          | −62.92              | −58.32        |
| propanal             |       | C <sub>3</sub> H <sub>6</sub> O              | −4          | −72.74              | −72.43        |
| acetone              |       | C <sub>3</sub> H <sub>6</sub> O              | −4          | −79.19              | −81.77        |
| 1,2-propanediol      |       | C <sub>3</sub> H <sub>8</sub> O <sub>2</sub> | −4          | −63.25              | −65.05        |
| 1,3-propanediol      |       | C <sub>3</sub> H <sub>8</sub> O <sub>2</sub> | −4          | −62.20              | −61.76        |

|                                 |       |        |     |         |         |
|---------------------------------|-------|--------|-----|---------|---------|
| acrolein                        |       | C3H4O  | −2  | −49.46  | −49.18  |
| propanoic acid                  | PRP   | C3H6O2 | −2  | −77.04  | −72.46  |
| lactaldehyde (hyd)              |       | C3H6O2 | −2  | −49.82  | −51.06  |
| 3-OH-propanal                   |       | C3H6O2 | −2  | −48.77  | −49.47  |
| OH-acetone                      | HA    | C3H6O2 | −2  | −50.30  | −57.06  |
| methylacetate                   |       | C3H6O2 | −2  | −58.42  | −64.22  |
| glycerol                        |       | C3H8O3 | −2  | −40.59  | −40.08  |
| acrylic acid                    | ACR   | C3H4O2 | 0   | −49.53  | −48.57  |
| methylglyoxal (hyd)             | MeGly | C3H4O2 | 0   | −37.22  | −38.93  |
| malonaldehyde (enol)            |       | C3H4O2 | 0   | −38.63  | −38.58  |
| lactic acid                     |       | C3H6O3 | 0   | −51.11  | −52.03  |
| 3-OH-propanoic acid             | 3HP   | C3H6O3 | 0   | −52.18  | −51.71  |
| glyceraldehyde (hyd)            | GLA   | C3H6O3 | 0   | −25.82  | −25.99  |
| di-OH-acetone                   | DHA   | C3H6O3 | 0   | −26.35  | −29.71  |
| trioxane                        |       | C3H6O3 | 0   |         | −10.62  |
| pyruvic acid                    | PYR   | C3H4O3 | 2   | −38.87  | −37.55  |
| malonic semialdehyde (enol)     | MSA   | C3H4O3 | 2   | −38.22  | −38.20  |
| glucic acid (enol)              |       | C3H4O3 | 2   |         | −12.87  |
| glycerosone                     |       | C3H4O3 | 2   |         | −9.55   |
| aceticformic anhydride          |       | C3H4O3 | 2   |         | −36.58  |
| glyceric acid                   |       | C3H6O4 | 2   | −27.80  | −27.12  |
| malonic acid                    | MLN   | C3H4O4 | 4   | −39.42  | −38.17  |
| hydroxypyruvic acid             | HPY   | C3H4O4 | 4   | −10.78  | −10.33  |
| 2-OH-3-oxopropanoic acid (enol) |       | C3H4O4 | 4   |         | −12.87  |
| dioxopropanoic acid             |       | C3H2O4 | 6   |         | 14.35   |
| tartronic acid                  |       | C3H4O5 | 6   | −12.53  | −11.96  |
| oxomalonic acid                 |       | C3H2O5 | 8   | 0.45    | 12.93   |
| C <sub>4</sub>                  |       |        |     |         |         |
| butane                          |       | C4H10  | −10 |         | −139.36 |
| isobutane                       |       | C4H10  | −10 |         | −140.56 |
| but-1-ene                       |       | C4H8   | −8  |         | −112.02 |
| butenecis                       |       | C4H8   | −8  |         | −114.69 |
| butenetrans                     |       | C4H8   | −8  |         | −113.68 |
| butenegem                       |       | C4H8   | −8  |         | −113.66 |
| 1-butanol                       |       | C4H10O | −8  | −120.24 | −115.92 |
| 1-isobutanol                    |       | C4H10O | −8  | −117.99 | −116.84 |
| 2-butanol                       |       | C4H10O | −8  |         | −119.54 |
| 2-isobutanol                    |       | C4H10O | −8  |         | −122.49 |
| butadiene_trans                 |       | C4H6   | −6  | −95.98  | −92.36  |
| butadiene_cis                   |       | C4H6   | −6  |         | −88.88  |
| butanal                         |       | C4H8O  | −6  | −106.09 | −104.77 |
| isobutanal                      |       | C4H8O  | −6  |         | −104.40 |
| butanone                        |       | C4H8O  | −6  | −106.61 | −113.27 |
| but-1-en-3-ol                   |       | C4H8O  | −6  |         | −92.79  |
| but-1-en-4-ol                   |       | C4H8O  | −6  |         | −90.16  |
| but-2-enol_cis                  |       | C4H8O  | −6  |         | −91.06  |
| but-2-enol_trans                |       | C4H8O  | −6  |         | −92.93  |
| but-2-enol_gem                  |       | C4H8O  | −6  |         | −93.04  |
| isobutenol                      |       | C4H8O  | −6  |         | −93.03  |

|                            |            |    |         |         |
|----------------------------|------------|----|---------|---------|
| tetrahydrofuran            | C4H8O      | −6 |         | −93.04  |
| 1,2-butanediol             | C4H10O2    | −6 |         | −95.32  |
| 1,3-butanediol             | C4H10O2    | −6 |         | −96.34  |
| 1,4-butanediol             | C4H10O2    | −6 |         | −93.09  |
| 2,3-butanediol             | C4H10O2    | −6 | −96.26  | −98.29  |
| 1,2-isobutanediol          | C4H10O2    | −6 |         | −98.49  |
| 1,3-isobutanediol          | C4H10O2    | −6 |         | −93.58  |
| but-2-enal_trans           | C4H6O      | −4 | −82.42  | −84.61  |
| but-2-enal_cis             | C4H6O      | −4 |         | −82.00  |
| but-2-enal_gem             | C4H6O      | −4 |         | −83.45  |
| methylvinylketone          | C4H6O      | −4 |         | −86.80  |
| dihydrofuran               | C4H6O      | −4 |         | −70.38  |
| butanoic acid              | C4H8O2     | −4 | −109.14 | −104.21 |
| isobutanoic acid           | C4H8O2     | −4 | −104.60 | −106.81 |
| 2-OH-butanal               | C4H8O2     | −4 |         | −81.49  |
| 3-OH-butanal               | C4H8O2     | −4 |         | −84.06  |
| 4-OH-butanal               | C4H8O2     | −4 |         | −80.99  |
| 2-OH-isobutanal            | C4H8O2     | −4 |         | −84.79  |
| 3-OH-isobutanal            | C4H8O2     | −4 |         | −80.63  |
| 1-OH-butanone              | C4H8O2     | −4 |         | −87.46  |
| 3-OH-butanone              | C4H8O2     | −4 | −83.69  | −90.29  |
| 4-OH-butanone              | C4H8O2     | −4 |         | −89.22  |
| 3,4-butenediol             | C4H8O2     | −4 |         | −68.48  |
| 1,4-butenediol_cis         | C4H8O2     | −4 |         | −65.92  |
| 1,4-butenediol_trans       | C4H8O2     | −4 |         | −68.01  |
| isobutenediol              | C4H8O2     | −4 |         | −67.62  |
| ethylacetate               | C4H8O2     | −4 | −94.42  | −94.02  |
| 1,4-dioxane                | C4H8O2     | −4 | −59.60  | −63.73  |
| 1,2,3-butanetriol          | C4H10O3    | −4 |         | −74.04  |
| 1,2,4-butanetriol          | C4H10O3    | −4 |         | −71.73  |
| 1,2,3-isoproptriol         | C4H10O3    | −4 |         | −74.04  |
| 1,3,3-isoproptriol         | C4H10O3    | −4 |         | −68.62  |
| furan                      | C4H4O      | −2 |         | −64.41  |
| crotonic acid              | CRT C4H6O2 | −2 | −82.49  | −85.80  |
| isocrotonic acid           | C4H6O2     | −2 |         | −83.26  |
| 3-butenic acid             | C4H6O2     | −2 |         | −80.19  |
| methacrylic acid           | C4H6O2     | −2 |         | −81.45  |
| 2-oxobutanal (enol)        | C4H6O2     | −2 |         | −68.18  |
| 3-oxobutanal (enol)        | C4H6O2     | −2 |         | −78.02  |
| succinaldehyde             | C4H6O2     | −2 |         | −69.57  |
| 3-oxobutanone              | C4H6O2     | −2 |         | −77.74  |
| methylmalonaldehyde (enol) | C4H6O2     | −2 |         | −71.07  |
| OH-methylacrolein_gem      | C4H6O2     | −2 |         | −58.73  |
| OH-methylacrolein_cis      | C4H6O2     | −2 |         | −56.39  |
| OH-methylacrolein_trans    | C4H6O2     | −2 |         | −60.74  |
| C4ald_2OH_alkene           | C4H6O2     | −2 |         | −53.95  |
| C4ket_OH_alkene            | C4H6O2     | −2 |         | −61.21  |
| gamma-butyrolactone        | C4H6O2     | −2 |         | −83.21  |
| 2-OH-butyric acid          | C4H8O3     | −2 | −82.99  | −82.79  |

|                                     |       |         |    |        |        |
|-------------------------------------|-------|---------|----|--------|--------|
| 3-OH-butyric acid                   | 3HB   | C4H8O3  | −2 | −87.39 | −86.46 |
| 4-OH-butyric acid                   | 4HB   | C4H8O3  | −2 | −77.78 | −83.49 |
| 2,3-diOH-butanal                    |       | C4H8O3  | −2 |        | −60.42 |
| 2,4-diOH-butanal                    |       | C4H8O3  | −2 |        | −57.18 |
| 3,4-diOH-butanal                    |       | C4H8O3  | −2 |        | −59.22 |
| 1,3-diOH-butanone                   |       | C4H8O3  | −2 |        | −64.26 |
| 1,4-diOH-butanone                   |       | C4H8O3  | −2 |        | −63.28 |
| dihydrofuran-3-one                  |       | C4H8O3  | −2 |        | −64.30 |
| 3,4-diOH-butanone                   |       | C4H8O3  | −2 |        | −64.83 |
| 2,3-diOH-isobutanal                 |       | C4H8O3  | −2 |        | −60.62 |
| 3,3-diOH-isobutanal                 |       | C4H8O3  | −2 |        | −55.68 |
| erythritol                          |       | C4H10O4 | −2 | −48.72 | −49.61 |
| vinylglyoxal                        |       | C4H4O2  | 0  |        | −41.21 |
| butenolide                          |       | C4H4O2  | 0  | −58.02 | −57.35 |
| 2-oxo-butanoic acid                 | AKB   | C4H6O3  | 0  | −70.92 | −68.75 |
| acetoacetic acid (enol)             | AcACE | C4H6O3  | 0  | −75.35 | −77.03 |
| succinic semialdehyde               | SSA   | C4H6O3  | 0  | −69.51 | −71.61 |
| 2-methyl-3-oxopropanoic acid (enol) |       | C4H6O3  | 0  | −67.60 | −70.49 |
| OH-methacrylic acid                 |       | C4H6O3  | 0  |        | −57.61 |
| 2-OH-but-3-enoic acid               |       | C4H6O3  | 0  |        | −54.93 |
| gamma-OH-crotonic acid              |       | C4H6O3  | 0  |        | −60.36 |
| gamma-OH-isocrotonic acid           |       | C4H6O3  | 0  |        | −57.50 |
| 3-OH-2-oxobutanal                   |       | C4H6O3  | 0  |        | −42.93 |
| 4-OH-2-oxobutanal                   |       | C4H6O3  | 0  |        | −43.23 |
| 2-OH-3-oxobutanal (enol)            |       | C4H6O3  | 0  |        | −51.88 |
| 4-OH-3-oxobutanal                   |       | C4H6O3  | 0  |        | −48.80 |
| 2-OH-4-oxobutanal                   |       | C4H6O3  | 0  |        | −44.86 |
| 1-OH-3-oxobutanone (enol)           |       | C4H6O3  | 0  |        | −52.89 |
| 2-OH-butyrolactone                  |       | C4H6O3  | 0  |        | −58.10 |
| 3-OH-butyrolactone                  |       | C4H6O3  | 0  |        | −61.23 |
| acetic anhydride                    |       | C4H6O3  | 0  |        | −74.44 |
| erythrose                           |       | C4H8O4  | 0  | −35.24 | −35.00 |
| erythrofuranose                     |       | C4H8O4  | 0  |        | −36.27 |
| threose                             |       | C4H8O4  | 0  | −35.19 | −35.81 |
| threofuranose                       |       | C4H8O4  | 0  |        | −36.57 |
| erythrulose                         |       | C4H8O4  | 0  | −35.84 | −39.05 |
| 2-CHO-glycerol                      |       | C4H8O4  | 0  |        | −34.98 |
| 4-deoxythreonic acid                |       | C4H8O4  | 0  |        | −61.25 |
| 3-deoxythreonic acid                |       | C4H8O4  | 0  |        | −58.48 |
| 3,4-diOH-butyric acid               |       | C4H8O4  | 0  |        | −61.59 |
| 2,3-diOH-isobutyric acid            |       | C4H8O4  | 0  |        | −61.19 |
| 3,3-diOH-isobutyric acid            |       | C4H8O4  | 0  |        | −57.65 |
| 2-oxobutenoic acid                  |       | C4H4O3  | 2  |        | −41.86 |
| 4-oxobutenoic_trans acid            |       | C4H4O3  | 2  |        | −46.57 |
| 4-oxobutenoic_cis acid              |       | C4H4O3  | 2  |        | −43.34 |
| succinic anhydride                  |       | C4H4O3  | 2  | −66.60 | −64.75 |
| succinic acid                       | SUC   | C4H6O4  | 2  | −71.35 | −74.04 |
| methylmalonic acid                  | MEM   | C4H6O4  | 2  | −67.36 | −69.75 |
| 3-OH-2-oxobutyric acid              |       | C4H6O4  | 2  |        | −43.51 |

|                                    |     |        |    |        |        |
|------------------------------------|-----|--------|----|--------|--------|
| 4-OH-2-oxobutyric acid             |     | C4H6O4 | 2  |        | −43.76 |
| 2-OH-3-oxobutyric acid             |     | C4H6O4 | 2  |        | −50.97 |
| 4-OH-3-oxobutyric acid             |     | C4H6O4 | 2  |        | −50.38 |
| 2-OH-4-oxobutyric acid             |     | C4H6O4 | 2  |        | −45.75 |
| 3-OH-4-oxobutyric acid             |     | C4H6O4 | 2  |        | −47.01 |
| 2-OH-3-oxoisopropanoic acid        |     | C4H6O4 | 2  |        | −44.25 |
| 3-OH-3-oxoisopropanoic acid (enol) |     | C4H6O4 | 2  |        | −45.60 |
| 3,4-diOH-2-oxobutanal              |     | C4H6O4 | 2  |        | −18.01 |
| 2,4-diOH-3-oxobutanal              |     | C4H6O4 | 2  |        | −24.38 |
| 2,3-diOH-4-oxobutanal              |     | C4H6O4 | 2  |        | −19.74 |
| 1,4-diOH-3-oxobutanone (enol)      |     | C4H6O4 | 2  |        | −26.19 |
| erythronolactone                   |     | C4H6O4 | 2  |        | −35.82 |
| threolactone                       |     | C4H6O4 | 2  |        | −34.75 |
| erythronic acid                    |     | C4H8O5 | 2  |        | −36.10 |
| threonic acid                      |     | C4H8O5 | 2  |        | −37.03 |
| maleic anhydride                   |     | C4H2O3 | 4  |        | −36.03 |
| fumaric acid                       | FUM | C4H4O4 | 4  | −47.57 | −46.92 |
| maleic acid                        |     | C4H4O4 | 4  | −46.45 | −41.79 |
| methylenemalononic acid            |     | C4H4O4 | 4  |        | −42.15 |
| 2,3-dioxobutyric acid              |     | C4H4O4 | 4  |        | −27.98 |
| 2,4-dioxobutyric acid (enol)       |     | C4H4O4 | 4  |        | −30.69 |
| 3,4-dioxobutyric acid (enol)       |     | C4H4O4 | 4  |        | −33.28 |
| glycolide                          |     | C4H4O4 | 4  |        | −24.19 |
| malic anhydride                    |     | C4H4O4 | 4  |        | −36.52 |
| malic acid                         | MAL | C4H6O5 | 4  | −48.31 | −48.14 |
| methyl-OH-malonic acid             |     | C4H6O5 | 4  |        | −44.13 |
| methyltartronic acid               |     | C4H6O5 | 4  |        | −44.49 |
| 3,4-diOH-2-oxobutanoic acid        |     | C4H6O5 | 4  |        | −18.66 |
| 2,4-diOH-3-oxobutanoic acid        |     | C4H6O5 | 4  |        | −23.70 |
| 2,3-diOH-4-oxobutanoic acid        |     | C4H6O5 | 4  |        | −22.02 |
| oxaloacetic acid (enol)            | OXA | C4H4O5 | 6  | −33.71 | −33.06 |
| aldehydemalonic acid (enol)        |     | C4H4O5 | 6  |        | −36.52 |
| tartaric acid                      |     | C4H6O5 | 6  | −59.95 | −23.29 |
| isotartaric acid                   |     | C4H6O5 | 6  |        | −18.87 |
| diOH-fumaraldehyde (enol)          |     | C4H6O5 | 6  |        | −8.53  |
| methaneTCacid                      |     | C4H4O6 | 8  |        | −31.51 |
| diOH-fumaric acid (enol)           |     | C4H4O6 | 8  | −13.20 | −9.89  |
| OH-aldehydemalonic acid            |     | C4H4O6 | 8  |        | 0.33   |
| dioxosuccinic acid                 |     | C4H2O6 | 10 |        | 22.07  |
| C <sub>5</sub>                     |     |        |    |        |        |
| mesaconic acid                     | MSC | C5H6O4 | 2  | −80.63 | −79.87 |
| citramalic acid                    | CTM | C5H8O5 | 2  | −77.66 | −81.55 |
| methylmalic acid                   | MML | C5H8O5 | 2  | −81.51 | −78.51 |
| alpha-ketoglutaric acid            | AKG | C5H6O5 | 4  | −66.81 | −66.06 |
| fumaroylformic acid                |     | C5H4O5 | 6  |        | −39.18 |
| maloylformic acid                  |     | C5H6O6 | 6  | −38.63 | −39.96 |
| C <sub>6</sub>                     |     |        |    |        |        |
| cis-aconitic acid                  | CAC | C6H6O6 | 6  | −76.73 | −71.80 |
| citric acid                        | CIT | C6H8O7 | 6  | −79.53 | −75.60 |

|                       |     |        |   |        |        |
|-----------------------|-----|--------|---|--------|--------|
| isocitric acid        | ISC | C6H8O7 | 6 | −75.59 | −74.82 |
| oxalosuccinic acid    | OXS | C6H6O7 | 8 | −64.50 | −57.60 |
| C <sub>7</sub>        |     |        |   |        |        |
| isocitroylformic acid |     | C7H8O8 | 8 |        | −65.54 |
| aconitoylformic acid  |     | C7H8O8 | 8 |        | −65.84 |
